# Supplementary material for: Discovery of a new type of methylenetetrahydrofolate reductase family that couples with tetrahydrofolate-dependent demethylases
Source: Research Square preprint supplement (doi:10.21203/rs.3.rs-4402079/v1), 2024-06-18
Supplement: Supplementary file 1 [file 623629cbb690a1dc1c8659cd.xlsx]

## Sheet: Supplementary table 1
Supplementary Table 1. S6MTHFR homologs with amino acid sequences in loop b2-a3, helix a8, and loop b8-a11
Phylum	Class	Order	Family	Genus-Species-Strain	Accession	Max Score	Total Score	Query Cover	E value	Identity (%)
proteobacteria	alphaproteobacteria	Sphingomonadales	Sphingomonadaceae	Sphingobium lignivorans SYK-6	BAK65950.1	585	585	1	0	1
proteobacteria	alphaproteobacteria	Sphingomonadales	Sphingomonadaceae	Sphingobium sp. AP50	SEJ93665.1	282	282	0.93	4e-96	0.5112
proteobacteria	alphaproteobacteria	Sphingomonadales	Sphingomonadaceae	Sphingobium sp. YR768	SER45842.1	287	287	0.93	4e-98	0.5149
proteobacteria	alphaproteobacteria	Sphingomonadales	Sphingomonadaceae	Sphingobium cupriresistens LL01	KMS53118.1	281	281	0.92	7e-96	0.5132
proteobacteria	alphaproteobacteria	Sphingomonadales	Sphingomonadaceae	Sphingobium amiense DSM 16289	BBD97062.1	288	288	0.94	2e-98	0.5128
proteobacteria	alphaproteobacteria	Sphingomonadales	Sphingomonadaceae	Sphingobium sp. ba1	KFL46195.1	287	287	0.93	6e-98	0.5204
proteobacteria	alphaproteobacteria	Sphingomonadales	Sphingomonadaceae	Sphingobium quisquiliarum P25	EQB14749.1	284	284	0.96	7e-97	0.5036
proteobacteria	alphaproteobacteria	Sphingomonadales	Sphingomonadaceae	Sphingobium sp. DC-2	WP_030541069.1	284	284	0.96	5e-97	0.5036
proteobacteria	alphaproteobacteria	Sphingomonadales	Sphingomonadaceae	Sphingobium xenophagum	ASY46078.1	282	282	0.92	1e-95	0.5132
proteobacteria	alphaproteobacteria	Sphingomonadales	Sphingomonadaceae	Sphingobium sp. TCM1	OAN59420.1	287	287	0.93	3e-98	0.513
proteobacteria	alphaproteobacteria	Sphingomonadales	Sphingomonadaceae	Sphingobium sp. Leaf26	KQM97236.1	282	282	0.96	4e-96	0.5072
proteobacteria	alphaproteobacteria	Sphingomonadales	Sphingomonadaceae	Sphingobium sp. RAC03	AOF94693.1	287	287	0.93	3e-98	0.5204
proteobacteria	alphaproteobacteria	Sphingomonadales	Sphingomonadaceae	Sphingobium chlorophenolicum L-1	AEG51610.1	313	313	0.94	2e-108	0.5625
proteobacteria	alphaproteobacteria	Sphingomonadales	Sphingomonadaceae	Sphingomonas sp. UNC305MFCol5.2	WP_231478201.1	293	293	0.93	1e-100	0.5572
proteobacteria	alphaproteobacteria	Sphingomonadales	Sphingomonadaceae	Sphingomonas hengshuiensis WHSC-8	AJP74161.1	306	306	0.95	2e-105	0.5362
proteobacteria	alphaproteobacteria	Sphingomonadales	Sphingomonadaceae	Sphingomonas wittichii	WP_156083956.1	338	338	0.98	9e-118	0.5579
proteobacteria	alphaproteobacteria	Sphingomonadales	Sphingomonadaceae	Sphingomonas asaccharolytica	WP_066804626.1	268	268	0.93	1e-90	0.4796
proteobacteria	alphaproteobacteria	Sphingomonadales	Sphingomonadaceae	Sphingomonas mali	WP_066818919.1	267	267	0.92	2e-90	0.4812
proteobacteria	alphaproteobacteria	Sphingomonadales	Sphingomonadaceae	Sphingomonas sp. 37zxx	WP_033921688.1	263	263	0.92	1e-88	0.4812
proteobacteria	alphaproteobacteria	Sphingomonadales	Sphingomonadaceae	Sphingomonas sp. Root710	WP_056379175.1	266	266	0.95	1e-89	0.4783
proteobacteria	alphaproteobacteria	Sphingomonadales	Sphingomonadaceae	Rhizorhabdus dicambivorans Ndbn-20	ALK02316.1	294	294	0.96	2e-103	0.5536
proteobacteria	alphaproteobacteria	Sphingomonadales	Sphingomonadaceae	Novosphingobium aromaticivorans DSM 12444	ABD27296.1	279	279	0.94	7e-95	0.5092
proteobacteria	alphaproteobacteria	Sphingomonadales	Sphingomonadaceae	Novosphingobium sp. PP1Y	CCA90559.1	288	288	0.93	1e-98	0.5279
proteobacteria	alphaproteobacteria	Sphingomonadales	Sphingomonadaceae	Novosphingobium sp. CCH12-A3	QOV93524.1	278	278	0.94	1e-94	0.5055
proteobacteria	alphaproteobacteria	Sphingomonadales	Sphingomonadaceae	Novosphingobium subterraneum DSM 12447	KHS48706.1	278	278	0.94	2e-94	0.5055
proteobacteria	alphaproteobacteria	Sphingomonadales	Sphingomonadaceae	Novosphingobium sp. SCN 66-18	ODU69507.1	278	278	0.94	2e-94	0.5129
proteobacteria	alphaproteobacteria	Sphingomonadales	Sphingomonadaceae	Novosphingobium sp. KN65.2	CDO38721.1	288	288	0.93	1e-98	0.5279
proteobacteria	alphaproteobacteria	Sphingomonadales	Sphingomonadaceae	Novosphingobium lentum NBRC 107847	WP_068073523.1	298	298	0.96	1e-102	0.5623
proteobacteria	alphaproteobacteria	Sphingomonadales	Sphingomonadaceae	Novosphingobium sp. AAP83	KPF93325.1	278	278	0.94	1e-94	0.5055
proteobacteria	alphaproteobacteria	Sphingomonadales	Sphingomonadaceae	Novosphingobium capsulatum HAMBI_0103	WQD92870.1	280	280	0.93	2e-95	0.4944
proteobacteria	alphaproteobacteria	Sphingomonadales	Sphingomonadaceae	Novosphingobium sp. AAP1	KPF51816.1	281	281	0.93	8e-96	0.4981
proteobacteria	alphaproteobacteria	Sphingomonadales	Sphingomonadaceae	Novosphingobium sp. Fuku2-ISO-50	KUR79157.1	277	277	0.93	4e-94	0.5037
proteobacteria	alphaproteobacteria	Sphingomonadales	Sphingomonadaceae	Novosphingobium sp. FSW06-99	KUR79608.1	327	327	0.93	8e-114	0.5978
proteobacteria	alphaproteobacteria	Sphingomonadales	Sphingomonadaceae	Novosphingobium sp. B-7	WP_022677630.1	282	282	0.93	5e-96	0.4981
proteobacteria	alphaproteobacteria	Sphingomonadales	Sphingomonadaceae	Novosphingobium fuchskuhlense FNE08-7	KUR73016.1	277	277	0.94	2e-94	0.4945
proteobacteria	alphaproteobacteria	Sphingomonadales	Sphingomonadaceae	Novosphingobium acidiphilum DSM 19966	WP_028641466.1	273	273	0.95	1e-92	0.4746
proteobacteria	alphaproteobacteria	Sphingomonadales	Sphingomonadaceae	Novosphingobium sp. AAP93	KPF81758.1	280	280	0.94	5e-95	0.4982
proteobacteria	alphaproteobacteria	Sphingomonadales	Sphingomonadaceae	Novosphingobium sp. MBES04	GAM05469.1	286	286	0.92	2e-97	0.517
proteobacteria	alphaproteobacteria	Sphingomonadales	Sphingomonadaceae	Novosphingobium sp. ST904	TCM33069.1	290	290	0.93	6e-99	0.5316
proteobacteria	alphaproteobacteria	Sphingomonadales	Sphingomonadaceae	Novosphingobium pentaromativorans US6-1	AIT81897.1	277	277	0.93	1e-93	0.5353
proteobacteria	alphaproteobacteria	Sphingomonadales	Sphingomonadaceae	Novosphingobium sp. SCN 63-17	ODU82189.1	264	264	0.92	5e-89	0.5
proteobacteria	alphaproteobacteria	Sphingomonadales	Sphingomonadaceae	Rhizorhapis suberifaciens NBRC 15211	MBB4640748.1	332	332	0.96	3e-111	0.5786
proteobacteria	alphaproteobacteria	Sphingomonadales	Erythrobacteraceae	Altericroceibacterium indicum DSM 18604	MXP26156.1	294	294	0.95	5e-96	0.5309
proteobacteria	alphaproteobacteria	Sphingomonadales	Erythrobacteraceae	Croceibacterium mercuriale Coronado	KHL26091.1	287	287	0.96	2e-93	0.5054
Pseudomonadota	alphaproteobacteria	Caulobacterales	Caulobacteraceae	Brevundimonas bacteroides DSM 4726	WP_029416367.1	314	314	0.97	5e-104	0.5371
Pseudomonadota	alphaproteobacteria	Caulobacterales	Caulobacteraceae	Brevundimonas sp. AAP58	KPF85039.1	313	313	0.94	1e-103	0.5511
proteobacteria	alphaproteobacteria	Caulobacterales	Caulobacteraceae	Brevundimonas subvibrioides ATCC 15264	ADL01439.1	321	321	0.96	1e-106	0.5536
Pseudomonadota	alphaproteobacteria	Caulobacterales	Caulobacteraceae	Brevundimonas variabilis	WP_183214128.1	314	314	0.92	3e-104	0.5564
proteobacteria	alphaproteobacteria	Hyphomicrobiales	Rhizobiaceae	Agrobacterium tumefaciens 17-1474eii	NSL21205.1	288	288	0.94	6e-94	0.4964
proteobacteria	alphaproteobacteria	Hyphomicrobiales	Phyllobacteriaceae	Chelativorans sp. J32	WP_084032862.1	305	305	0.96	2e-100	0.552
proteobacteria	alphaproteobacteria	Hyphomicrobiales	Phyllobacteriaceae	Nitratireductor aestuarii CGMCC 1.15320	GGA63963.1	302	302	0.95	2e-99	0.5491
proteobacteria	alphaproteobacteria	Parvularculales	Parvularculaceae	Marinicaulis flavus SY-3-19	PQA89555.1	287	287	0.96	2e-93	0.518
Cyanobacteria	Cyanophyceae	Nostocales	Nostocaceae	Nostoc sp. 3335mG	PXA97671.1	290	290	0.95	2e-96	0.5181
proteobacteria	alphaproteobacteria	Hyphomicrobiales	Methylobacteriaceae	Methylorubrum extorquens CM4	ACK86440.1	169	169	0.94	2e-51	0.3273
Actinomycetota	Actinomycetes	Pseudonocardiales	Pseudonocardiaceae	Actinophytocola sp. Dino_bin49	MPY98056.1	164	164	0.85	1e-49	0.337
Actinobacteria	Actinomycetes	Pseudonocardiales	Pseudonocardiaceae	Actinophytocola sp. Dino_bin57	MPY80869.1	173	173	0.88	5e-53	0.3571
Pseudomonadota	alphaproteobacteria	unclassified Alphaproteobacteria	-	Alphaproteobacteria bacterium HT1-32	WP_153780581.1	190	190	0.88	6e-60	0.3467
proteobacteria	Gammaproteobacteria	unclassified Gammaproteobacteria	-	Gammaproteobacteria bacterium	MXZ80409.1	193	193	0.9	4e-61	0.3516
proteobacteria	Gammaproteobacteria	unclassified Gammaproteobacteria	-	Gammaproteobacteria bacterium	NKB77702.1	195	195	0.91	8e-62	0.3504
Actinobacteria	Actinomycetes	Micrococcales	Microbacteriaceae	Leifsonia xyli subsp. cynodontis DSM 46306	PZQ88622.1	156	156	0.85	1e-46	0.3137
proteobacteria	alphaproteobacteria	Hyphomicrobiales	Lichenihabitantaceae	Lichenihabitans psoromatis PAMC 29128	WP_131120151.1	145	145	0.95	4e-42	0.3036
Pseudomonadota	alphaproteobacteria	Hyphomicrobiales	unclassified Hyphomicrobiales	Rhizobiales bacterium 12-66-7	OYW33214.1	139	139	0.94	3e-40	0.3091
Pseudomonadota	alphaproteobacteria	Hyphomicrobiales	unclassified Hyphomicrobiales	Rhizobiales bacterium 35-66-30	OYY88108.1	149	149	0.86	1e-43	0.3077
proteobacteria	alphaproteobacteria	Rhodospirillales	Thalassospiraceae	Magnetovibrio sp.	MBB53636.1	214	214	0.86	3e-69	0.3895
proteobacteria	alphaproteobacteria	Rhodospirillales	Thalassospiraceae	Magnetovibrio sp.	MBR83449.1	213	213	0.86	1e-68	0.3895
Pseudomonadota	alphaproteobacteria	Rhodospirillales	Rhodospirillaceae	Rhodospirillaceae bacterium	WP_155409582.1	211	211	0.86	6e-68	0.3708
Pseudomonadota	Gammaproteobacteria	Cardiobacteriales	Ostreibacteriaceae	Ostreibacterium oceani ML27	MPV86230.1	181	181	0.91	2e-56	0.3407
Pseudomonadota	unclassified Pseudomonadota	-	-	Proteobacteria bacterium	PID47807.1	176	176	0.92	2e-54	0.3187

## Sheet: Supplementary table 2
Supplementary Table 2. Primers used for mutation of S6MTHFR gene
Mutation	Primer	Sequence (5ʹ to 3ʹ)a
Pro49Ala	S6FP49A5	GGCACGCTGATCTCCGTGACGTTCCTCgcaGGCGCCGAATATGAGGATCGCGCCCGC
	S6FP49A3	GCGGGCGCGATCCTCATATTCGGCGCCtgcGAGGAACGTCACGGAGATCAGCGTGCC
Phe215Ala	S6FF215A5	TCGATCAAGACGCTGCTGCGCgctGCCGCGCGGTGCGGCGTGGGC
	S6FF215A3	GCCCACGCCGCACCGCGCGGCagcGCGCAGCAGCGTCTTGATCGA
Cys219Ala	sC219A5	ACGCTGCTGCGCTTCGCCGCGCGGgcgGGCGTGGGCACCTCGGCCAAGGTC
	sC219A3	GACCTTGGCCGAGGTGCCCACGCCcgcCCGCGCGGCGAAGCGCAGCAGCGT
Phe269Gly	S6FF269G5	CAGGTGCATCTGCACTTCTATCCCggcGGTGGCCTGGTGAAGACCAACGAG
	S6FF269G3	CTCGTTGGTCTTCACCAGGCCACCgccGGGATAGAAGTGCAGATGCACCTG
Leu48Gly-Pro49Gly	S6FL48GP49G_5	ACGCTGATCTCCGTGACGTTCggcggcGGCGCCGAATATGAGGATCGCGCC
	S6FL48GP49G_3	GGCGCGATCCTCATATTCGGCGCCgccgccGAACGTCACGGAGATCAGCGT
Leu48Gly	S6FL48G5	GGCACGCTGATCTCCGTGACGTTCggcCCCGGCGCCGAATATGAGGATCGC
	S6FL48G3	GCGATCCTCATATTCGGCGCCGGGgccGAACGTCACGGAGATCAGCGTGCC
Phe215Ala-Cys219Ala	F215AC219A5	TCGATCAAGACGCTGCTGCGCgctGCCGCGCGGgcgGGCGTGGGCACCTCGGCCAAGGTC
	F215AC219A3	GACCTTGGCCGAGGTGCCCACGCCcgcCCGCGCGGCagcGCGCAGCAGCGTCTTGATCGA
Pro268Thr-Phe269Leu	S6P268T269L5	CAGGTGCATCTGCACTTCTATacgctcGGTGGCCTGGTGAAGACCAACGAG
	S6P268T269L3	CTCGTTGGTCTTCACCAGGCCACCgagcgtATAGAAGTGCAGATGCACCTG
Gly270Asn-Gly271Arg-Leu272Ala	S6G270N271R272A5	CAGGTGCATCTGCACTTCTATACGCTCaaccgtgcaGTGAAGACCAACGAGTGGATCGTC
	S6G270N271R272A3	GACGATCCACTCGTTGGTCTTCACtgcacggttGAGCGTATAGAAGTGCAGATGCACCTG
aMutation sequences are shown by lowercase.

## Sheet: Supplementary table 3
Supplementary Table 3. Strains and plasmids used in this study
Strain or plasmid	Relevant characteristic(s)	Source or reference
Strains
Escherichia coli DH5a	F-, Φ80dlacZΔM15, Δ(lacZYA-argF)U169, deoR, recA1, endA1, hsdR17(rK-, mK+), phoA, supE44, λ-, thi-1, gyrA96, relA1	Takara
Escherichia coli BL21(DE3)	E. coli B F-dcm ompT hsdSB(rB-mB-)gal	Invitrogen
Plasmids
pET-44a(+)	Expression vector, T7 promoter, His tag, ampicillin resistance	Novagen
pS6WT	pET-44a(+) containing S6MTHFR gene	This study
pS6P49A	pS6WT with Pro49Ala mutation in S6MTHFR gene	This study
pS6F215A	pS6WT with Phe215Ala mutation in S6MTHFR gene	This study
pS6C219A	pS6WT with Cys219Ala mutation in S6MTHFR gene	This study
pS6F269G	pS6WT with Phe269Gly mutation in S6MTHFR gene	This study
pS6LP	pS6WT with Leu48Gly-Pro49Gly mutation in S6MTHFR gene	This study
pS6LCF	pS6WT with Leu48Gly-Cys219Ala-Phe269Gly mutation in S6MTHFR gene	This study
pS6FCF	pS6WT with Phe215Ala-Cys219Ala-Phe269Gly mutation in S6MTHFR gene	This study
pS6LPCF	pS6WT with Leu48Gly-Pro49Gly-Cys219Ala-Phe269Gly mutation in S6MTHFR gene	This study
pS6LPPFGGL	pS6WT with Leu48Gly-Pro49Gly-Pro268Thr-Phe269Leu-Gly270Asn-Gly271Arg-Leu272Ala mutation in S6MTHFR gene	This study

## Sheet: Supplementary table 4
Supplementary Table 4. MTHFRs used for phylogenetic analysis
Type	Domain	Phylum	Class	Order	Family	Genus-Species-Strain	Accession
4	Bacteria	proteobacteria	alphaproteobacteria	Sphingomonadales	Sphingomonadaceae	Sphingobium lignivorans SYK-6	BAK65950.1
4	Bacteria	proteobacteria	alphaproteobacteria	Sphingomonadales	Sphingomonadaceae	Rhizorhabdus dicambivorans Ndbn-20	ALK02316.1
4	Bacteria	proteobacteria	alphaproteobacteria	Sphingomonadales	Sphingomonadaceae	Sphingobium sp. DC-2	WP_030541069.1
4	Bacteria	proteobacteria	alphaproteobacteria	Sphingomonadales	Sphingomonadaceae	Novosphingobium aromaticivorans DSM 12444	ABD27296.1
4	Bacteria	proteobacteria	alphaproteobacteria	Sphingomonadales	Sphingomonadaceae	Novosphingobium sp. SCN 66-18	ODU69507.1
4	Bacteria	proteobacteria	alphaproteobacteria	Sphingomonadales	Sphingomonadaceae	Rhizorhapis suberifaciens DSM 7465	MBB4640748.1
4	Bacteria	proteobacteria	alphaproteobacteria	Sphingomonadales	Erythrobacteraceae	Altererythrobacter indicus DSM 18604	MXP26156.1
4	Bacteria	proteobacteria	alphaproteobacteria	Sphingomonadales	Erythrobacteraceae	Croceibacterium mercuriale Coronado	KHL26091.1
4	Bacteria	proteobacteria	alphaproteobacteria	Hyphomicrobiales	Methylobacteriaceae	Methylorubrum extorquens CM4	ACK86440.1
4	Bacteria	proteobacteria	alphaproteobacteria	Hyphomicrobiales	Phyllobacteriaceae	Chelativorans sp. J32	WP_084032862.1
4	Bacteria	proteobacteria	alphaproteobacteria	Hyphomicrobiales	Phyllobacteriaceae	Nitratireductor aestuarii CGMCC 1.15320	GGA63963.1
4	Bacteria	proteobacteria	alphaproteobacteria	Hyphomicrobiales	Rhizobiaceae	Agrobacterium tumefaciens 17-1474eii	NSL21205.1
4	Bacteria	proteobacteria	alphaproteobacteria	Hyphomicrobiales	Lichenihabitantaceae	Lichenihabitans psoromatis PAMC 29128	WP_131120151.1
4	Bacteria	proteobacteria	alphaproteobacteria	Caulobacterales	Caulobacteraceae	Brevundimonas subvibrioides ATCC 15264	ADL01439.1
4	Bacteria	proteobacteria	alphaproteobacteria	Parvularculales	Parvularculaceae	Marinicaulis flavus SY-3-19	PQA89555.1
4	Bacteria	proteobacteria	alphaproteobacteria	Rhodospirillales	Thalassospiraceae	Magnetovibrio sp.	MBB53636.1
4	Bacteria	proteobacteria	Gammaproteobacteria	unclassified Gammaproteobacteria	-	Gammaproteobacteria bacterium	MXZ80409.1
4	Bacteria	proteobacteria	Gammaproteobacteria	Cardiobacteriales	Ostreibacteriaceae	Ostreibacterium oceani ML27	MPV86230.1
4	Bacteria	Actinobacteria	Actinomycetes	Micrococcales	Microbacteriaceae	Leifsonia xyli subsp. cynodontis DSM 46306	PZQ88622.1
4	Bacteria	Actinobacteria	Actinomycetes	Pseudonocardiales	Pseudonocardiaceae	Actinophytocola sp.	MPY80869.1
4	Bacteria	Cyanobacteria	Cyanophyceae	Nostocales	Nostocaceae	Nostoc sp. 3335mG	PXA97671.1
3	Bacteria	Bacillota	Clostridia	Thermoanaerobacterales	Thermoanaerobacteriaceae	Moorella thermoacetica DSM 521	AKX93964.1
3	Bacteria	Cyanobacteria	Cyanophyceae	Synechococcales	Merismopediaceae	Synechocystis sp. PCC 6714	WP_028946831.1
3	Bacteria	Bacillota	Clostridia	Eubacteriales	Lachnospiraceae	Clostridium formicaceticum DSM 92	ARE86799.1
3	Bacteria	Bacillota	Clostridia	Clostridiales	Eubacteriaceae	Acetobacterium woodii DSM 1030	AFA47722.1
3	Bacteria	Bacillota	Clostridia	Eubacteriales	Peptostreptococcaceae	Clostridioides difficile 630	AJP10400.1
3	Bacteria	Cyanobacteriota	Cyanophyceae	Chroococcales	Microcystaceae	Microcystis aeruginosa NIES-298	QHU83315.1
3	Bacteria	Cyanobacteria	Cyanophyceae	Synechococcales	Merismopediaceae	Synechocystis sp. CACIAM 05	WP_162327960.1
3	Bacteria	Bacillota	Clostridia	Clostridiales	Eubacteriaceae	Eubacterium limosum 8486cho	PWW50683.1
2	Bacteria	proteobacteria	Gammaproteobacteria	Enterobacterales	Enterobacteriaceae	Escherichia coli K-12	P0AEZ1.1
2	Bacteria	proteobacteria	Gammaproteobacteria	Enterobacterales	Enterobacteriaceae	Salmonella enterica subsp. enterica serovar Typhimurium str. LT2	P11003.2
2	Bacteria	proteobacteria	alphaproteobacteria	Hyphomicrobiales	Rhizobiaceae	Agrobacterium fabrum str. C58	AAK87532.2
2	Bacteria	Bacteroidota	Bacteroidia	Bacteroidales	Bacteroidaceae	Bacteroides thetaiotaomicron F9-2	BCA48375.1
2	Bacteria	Actinomycetota	Actinomycetes	Bifidobacteriales	Bifidobacteriaceae	Bifidobacterium longum NCC2705	AAN24612.1
2	Bacteria	Deinococcota	Deinococci	Thermales	Thermaceae	Thermus thermophilus HB27	AAS81998.1
2	Bacteria	proteobacteria	Gammaproteobacteria	Enterobacterales	Pectobacteriaceae	Pectobacterium carotovorum subsp. carotovorum	P71319.1
2	Bacteria	proteobacteria	Betaproteobacteria	Neisseriales	Neisseriaceae	Neisseria meningitidis MC58	Q9JZQ3.1
2	Bacteria	proteobacteria	Gammaproteobacteria	Pasteurellales	Pasteurellaceae	Haemophilus influenzae Rd KW20	P45208.1
2	Bacteria	proteobacteria	Gammaproteobacteria	Enterobacterales	Erwiniaceae	Buchnera aphidicola APS	P57154.1
2	Bacteria	proteobacteria	Gammaproteobacteria	Enterobacterales	Erwiniaceae	Schizaphis graminum	Q8KA62.1
2	Eukaryota	Arthropoda	Insecta	Hemiptera	Aphididae	Baizongia pistaciae	Q89B13.1
2	Bacteria	Aquificota	Aquificae	Aquificales	Aquificaceae	Aquifex aeolicus VF5	O67422.1
2	Bacteria	Actinomycetota	Actinomycetes	Kitasatosporales	Streptomycetaceae	Streptomyces lividans 1326	O54235.1
2	Eukaryota	Bacillota	Negativicutes	Selenomonadales	Veillonellaceae	Sporomusa ovata DSM 2662	EQB28910.1
1	Eukaryota	Streptophyta	Magnoliopsida	Brassicales	Brassicaceae	Arabidopsis thaliana	Q9SE60.1
1	Eukaryota	Streptophyta	Magnoliopsida	Brassicales	Brassicaceae	Arabidopsis thaliana	O80585.2
1	Eukaryota	Streptophyta	Magnoliopsida	Poales	Poaceae	Oryza sativa Japonica Group	Q75HE6.1
1	Eukaryota	Streptophyta	Magnoliopsida	Poales	Poaceae	Zea mays	Q9SE94.1
1	Eukaryota	Ascomycota	Saccharomycetes	Saccharomycetales	Saccharomycetaceae	Saccharomyces cerevisiae S288C	P53128.2
1	Eukaryota	Ascomycota	Schizosaccharomycetes	Schizosaccharomycetales	Schizosaccharomycetaceae	Schizosaccharomyces pombe 972h	Q10258.1
1	Eukaryota	Nematoda	Chromadorea	Rhabditida	Rhabditidae	Caenorhabditis elegans	Q17693.2
1	Eukaryota	Ascomycota	Saccharomycetes	Saccharomycetales	Saccharomycetaceae	Saccharomyces cerevisiae S288C	P46151.2
1	Eukaryota	Ascomycota	Schizosaccharomycetes	Schizosaccharomycetales	Schizosaccharomycetaceae	Schizosaccharomyces pombe 972h	O74927.2
1	Eukaryota	Evosea	Eumycetozoa	Dictyosteliales	Dictyosteliaceae	Dictyostelium discoideum AX4	XP_641844.1
1	Eukaryota	Ascomycota	Eurotiomycetes	Eurotiales	Aspergillaceae	Aspergillus nidulans FGSC A4	XP_663487.1
1	Eukaryota	Ascomycota	Eurotiomycetes	Eurotiales	Aspergillaceae	Aspergillus oryzae RIB40	XP_001821959.1
1	Eukaryota	Chordata	Mammalia	Primates	Cercopithecidae	Macaca fascicularis	Q60HE5.1
1	Eukaryota	Chordata	Mammalia	Primates	Hominidae	Homo sapiens	P42898.3
1	Eukaryota	Chordata	Mammalia	Rodentia	Muridae	Mus musculus	Q9WU20.2
1	Eukaryota	Chordata	Mammalia	Artiodactyla	Bovidae	Bos taurus	Q5I598.1
